# Supplementary material for: Co3C as a promising cocatalyst for superior photocatalytic H2production based on swift electron transfer processes
Source: Royal Society of Chemistry journal article supplement (doi:10.1039/d0tc05674j), 2021-01-01
Supplement: d0tc05674j1.pdf [file d0tc05674j1.pdf]

*Supporting Information*

**Co<sub>3</sub>C as a Promising Cocatalyst for Superior Photocatalytic H<sub>2</sub>  
Production Based on Swift Electron Transfer Process**

Rana Muhammad Irfan<sup>a\*</sup>, Mudassir Hussain Tahir<sup>b</sup>, Shahid Iqbal<sup>c</sup>, Mubashar Nadeem<sup>d</sup>, Tariq  
Bashir<sup>a</sup>, Mudassar Maqsood<sup>a</sup>, Jianqing Zhao<sup>a\*</sup>, Lijun Gao<sup>a\*</sup>

<sup>a</sup>College of Energy, Soochow Institute for Energy and Materials Innovations (SIEMIS),  
Soochow University, Suzhou 215006, China

<sup>b</sup>School of Power and Energy Engineering, Shandong University, Jinan 250100, China.

<sup>c</sup>Department of Chemistry and Materials Engineering, Huizhou University, Huizhou 516007,  
Guangdong, China.

<sup>d</sup>Department of Material Science, Newcastle University, Newcastle Upon Tyne, NE17RU, UK.

\*To whom correspondence should be addressed  
E-mail: jqzhao@suda.edu.cn, gaolijun@suda.edu.cn,  
Tel/Fax: +86-512-65229905.

## **2. Experimental**

### **2.1. Materials**

All the chemicals and reagents, including cobalt chloride ( $\text{CoCl}_2$ , 98%), tetraethylene glycol ( $\text{C}_6\text{H}_{14}\text{O}_4$ , 99%), cadmium chloride hemipentahydrate ( $\text{CdCl}_2 \cdot 2.5\text{H}_2\text{O}$ , 99.0%), sodium sulfide nonahydrate ( $\text{Na}_2\text{S} \cdot 9\text{H}_2\text{O}$ , 99.0%) anhydrous sodium sulfate ( $\text{Na}_2\text{SO}_3$ , 99.0%) and thiourea ( $\text{CH}_4\text{N}_2\text{S}$ , 99.0%), were purchased from Sigma Aldrich and used without further purification.

### **2.2. Synthesis of cocatalysts and photocatalysts**

The highly efficient  $\text{Co}_3\text{C}$  was prepared using a reported method.<sup>1</sup> Obtained  $\text{Co}_3\text{C}$  was further used to prepare composite photocatalysts. Typically, 101 mg of CdS NRs were added to a 50 mL flask containing 10 mL ethanol followed by the addition of calculated amount (3 mg, 6 mg, 12 mg, 25 mg and 50 mg) of  $\text{Co}_3\text{C}$ . The flask was sealed and purged with  $\text{N}_2$  for 15 min to remove the air. The suspension was well dispersed using ultrasonication for 30 min. The sample was dried at 80 °C under vacuum. The obtained sample was gently ground in an agate mortar for 15 min and then annealed at 200 °C under Ar. The prepared samples were labeled as CC1, CC2, CC3, CC4 and CC5. For comparative study, similar process was performed with pure CdS NRs. Pt/CdS NRs photocatalyst was obtained through loading of 1 wt% Pt on pristine CdS NRs by a reported procedure.<sup>2</sup>

### **2.3. Photocatalytic $\text{H}_2$ production**

The Photocatalytic activities of photocatalytic samples for  $\text{H}_2$  production were explored in 50 mL round bottom flask under visible light. For visible light irradiation, a 300 W Xe lamp equipped with 420 nm cut-off filter was used. The photocatalytic reaction mixtures were prepared in 20 mL Millipore water having 2.0 mg photocatalyst,  $\text{Na}_2\text{S}/\text{Na}_2\text{SO}_3$  as sacrificial

reagent. Air from the reaction mixture was removed by N<sub>2</sub> purging for 15 min and 5 mL methane was added as internal standard. H<sub>2</sub> gas resulted from photocatalytic sample was quantified by gas chromatography (GC, SP-6890, N<sub>2</sub> as carrier gas) equipped with thermal conductivity detector (TCD). A monochromatic light (420 nm) was employed for apparent quantum yields (AQYs) and calculations were performed according to the following equation:

$$\begin{aligned} \text{AQY (\%)} &= \frac{\text{number of reacted electrons}}{\text{number of incident photons}} \times 100 \\ &= \frac{\text{number of evolved H}_2\text{ molecules} \times 2}{\text{number of incident photons}} \times 100 \quad (1) \end{aligned}$$

#### 2.4. Photoelectrochemical studies

Photocurrent performance of the photocatalytic samples was studied using a CHI602E work station (Shanghai Chenhua Instrument Co., Ltd, Shanghai, China). A standard three-electrode system was established using photocatalyst-coated FTO as working electrode, Ag/AgCl as reference electrode and Pt wire as counter electrode. Visible light irradiation was provided with a 300 W Xe lamp equipped with 420 nm cut-off filter. Working electrodes were prepared by adding 15  $\mu$ L suspensions of CdS and Co<sub>3</sub>C/CdS NRs (20 mg/mL) onto the surface of FTO and dried at room temperature. For measurements, an applied potential of 0 V vs Ag/AgCl was used in 0.5 M Na<sub>2</sub>SO<sub>4</sub> aqueous solution as electrolyte. The polarization curves were measured using linear sweep voltammetry (LSV) with a scan rate of 5 mV/s.

#### 2.5. Characterization

Morphologies of the samples were studied on scanning electron microscopy (SEM) using a JSM-6700F microscope. Transmission electron microscopy (TEM) and energy-dispersive X-ray analysis (EDX) analysis were obtained on the transmission electron microscope JEM-2010

equipped with a Rontec EDX system and electron diffraction (ED) attachment with an acceleration voltage of 200 kV. Powder X-ray diffraction analysis of the compounds was done on (XRD, D/max-TTR III) using graphite monochromatized Cu K $\alpha$  radiation of 1.54178 Å, operating at 40 kV and 200 mA. The scanning rate was 5° min<sup>-1</sup> from 20° to 80° in 2 $\theta$ . XPS studies were performed on an ESCALAB 250 X-ray photoelectron spectrometer. ICP-AES (Optima 7300 DV) was used for the measurement of cobalt contents in photocatalysts. The steady-state photoluminescence (PL) spectra were obtained using a Perkin-Elmer LS 55 fluorescence spectrometer. UV-vis diffuse reflectance was performed on a Solid Spec-3700 UV-vis spectrometer. Time-resolved photoluminescence (TRPL) spectra were obtained on a PicoHarp 300 (PicoQuant) TRPL spectrometer.

**Table S1.** ICP-AES data of Co<sub>3</sub>C/CdS samples.

| Sample | Co (wt%)/<br>ICP-AES data |
|--------|---------------------------|
| CC1    | 2.23                      |
| CC2    | 5.18                      |
| CC3    | 11.67                     |
| CC4    | 24.31                     |
| CC5    | 48.74                     |

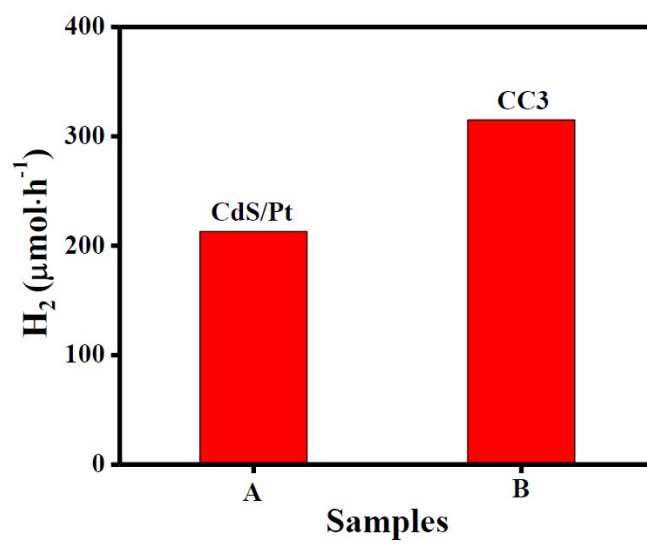

**Figure S1.** Comparison of photocatalytic performance of CdS NR loaded with Pt and CC3 using 2 mg photocatalyst in 20 mL Millipore water containing 1.0 M Na<sub>2</sub>S and 1.40 M Na<sub>2</sub>SO<sub>3</sub>.

**Table S2.** Comparison of photocatalytic performance of carbides/CdS based photocatalytic systems. For better comparison, data was converted to  $\text{mmol h}^{-1} \text{g}^{-1}$ .

| <b>Sr. No.</b> | <b>Photocatalyst</b>                     | <b>Rate<br/>(<math>\text{mmol h}^{-1} \text{g}^{-1}</math>)</b> | <b>AQY (%)</b> | <b>Reference</b> |
|----------------|------------------------------------------|-----------------------------------------------------------------|----------------|------------------|
| 1              | CdS/WC                                   | 1.35                                                            | ----           | <sup>3</sup>     |
| 2              | CdS/Ni <sub>3</sub> C                    | 18.2                                                            | 8.72 (420 nm)  | <sup>4</sup>     |
| 3              | CdS/Ti <sub>3</sub> C <sub>2</sub> Mxene | 14.34                                                           | 40.1 (420 nm)  | <sup>5</sup>     |
| 4              | CdS/VC                                   | 14.2                                                            | 8.7 (420 nm)   | <sup>6</sup>     |
| 5              | CdS/Mo <sub>2</sub> C                    | 1.61                                                            | 3.41 (420 nm)  | <sup>7</sup>     |
| 6              | CdS/Co <sub>3</sub> C                    | 15.75                                                           | 19 (420 nm)    | Present work     |

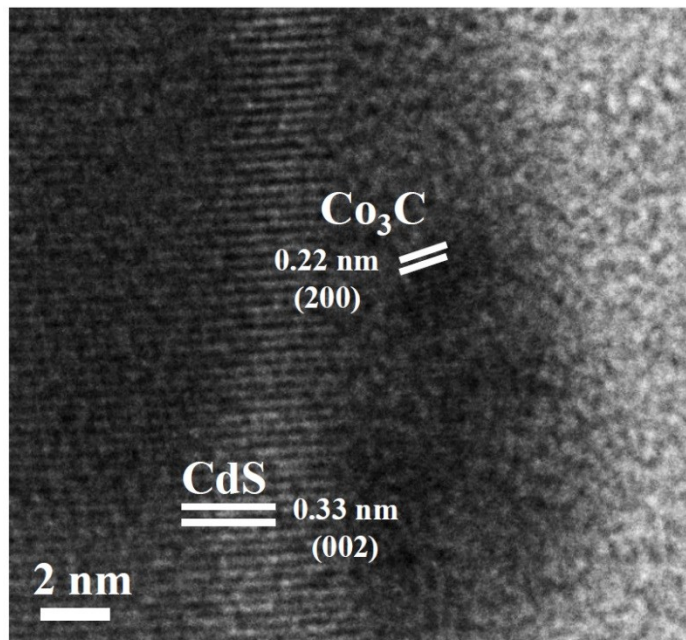

**Figure S2.** HRTEM image of CC3.



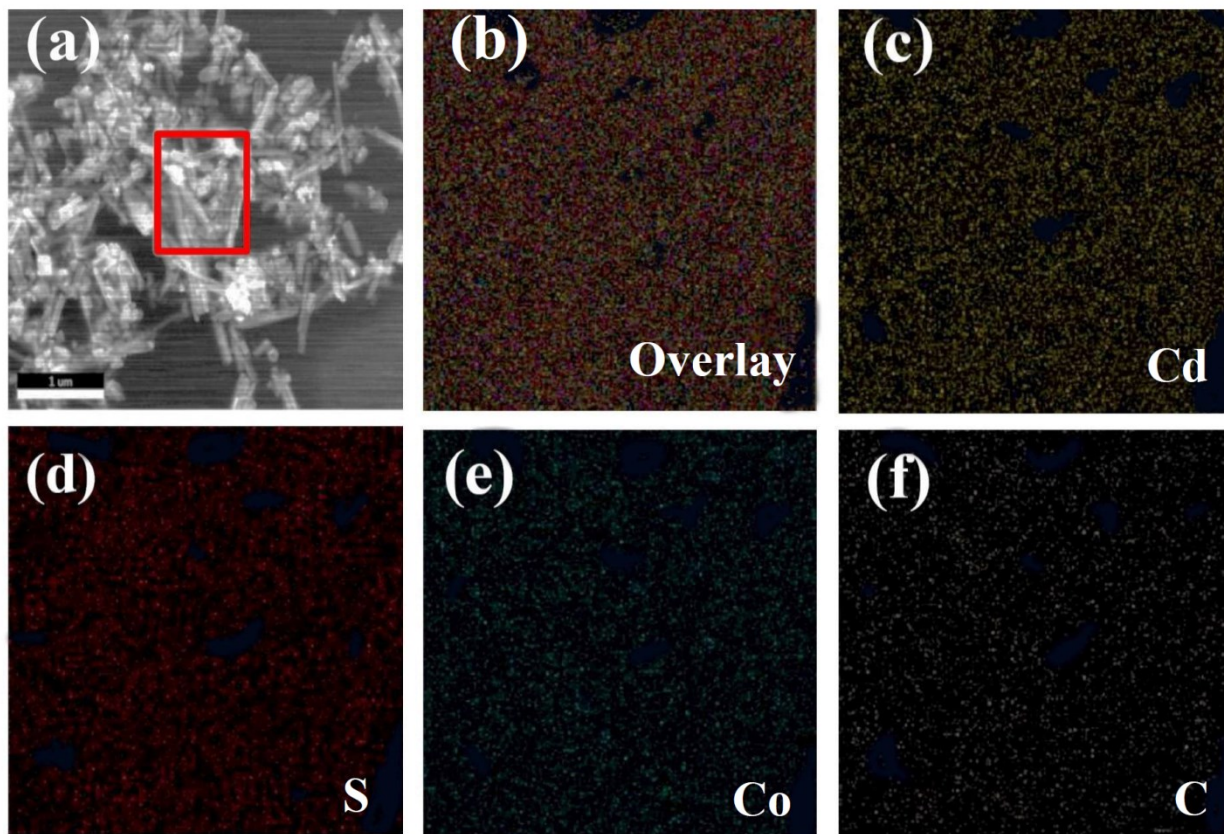

**Figure S3.** EDS elemental mapping images of CC3.

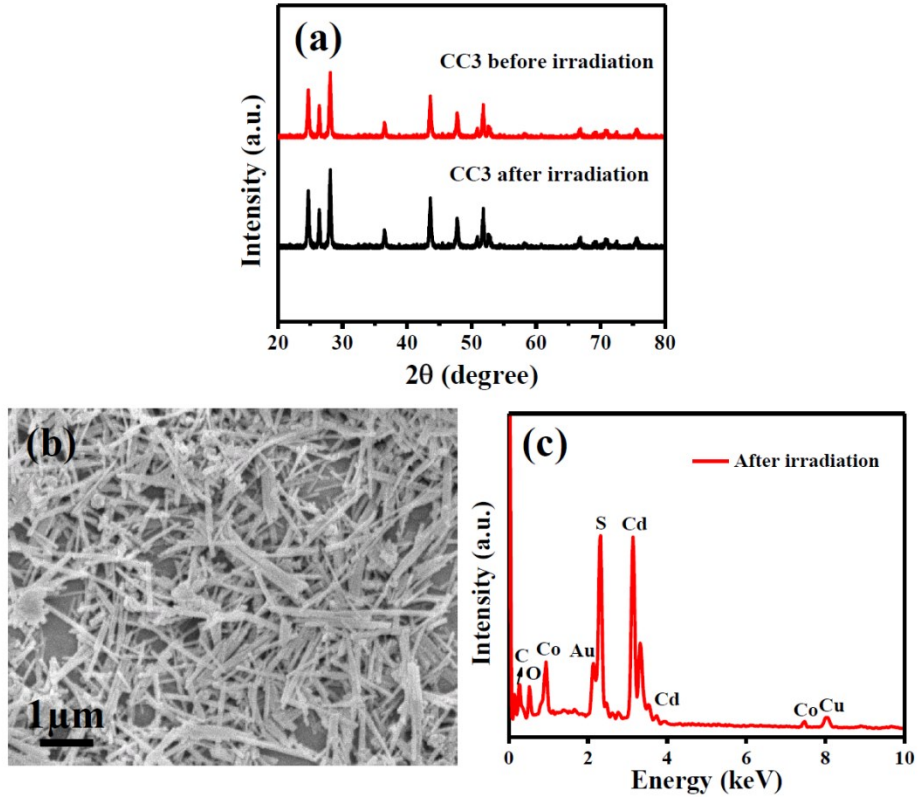

**Figure S4.** (a) XRD patterns of CC3 before (red plot) and after (black plot) irradiation. (b) SEM image of CC3 after irradiation. (c) EDX spectrum of CC3 after irradiation.

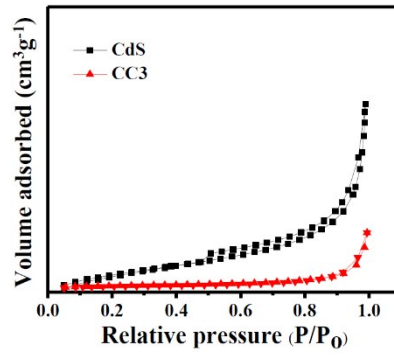

| Entry | Catalyst | Surface area ( $S_{\text{BET}}$ )<br>( $\text{m}^2 \text{g}^{-1}$ ) | Pore Volume<br>( $\text{cm}^3 \text{g}^{-1}$ ) |
|-------|----------|---------------------------------------------------------------------|------------------------------------------------|
| 1     | CdS      | 24.46                                                               | 0.11                                           |
| 2     | CC3      | 13.49                                                               | 0.045                                          |

**Figure S5.** Nitrogen adsorption–desorption isotherms and corresponding pore-size distribution curves

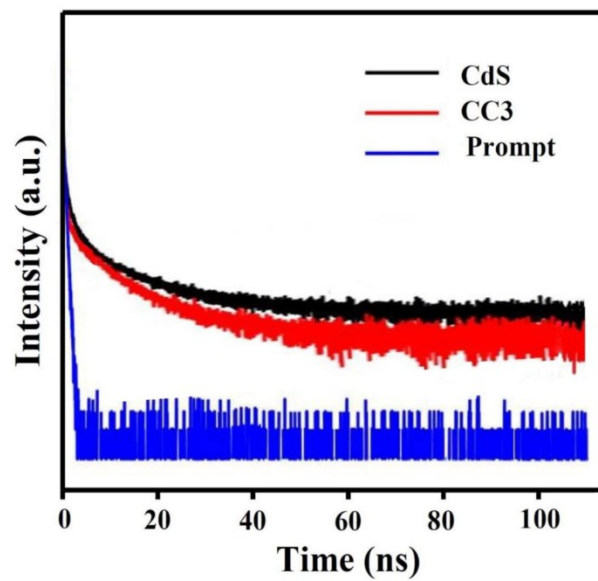

**Figure S6.** Time-resolved photoluminescence (TRPL) spectra of CdS NRs, and Co<sub>3</sub>C/CdS NRs at an excitation wavelength of 405 nm.

## References

1. K. J. Carroll, Z. J. Huba, S. R. Spurgeon, M. Qian and S. N. Khanna, *Appl. Phys. Lett.*, 2012, **101**, 012409.
2. Y. Wang, Y. Wang and R. Xu, *J. Phys. Chem. C*, 2013, **117**, 783-790.
3. S. J. Jum, J. H. Dong, L. Narayanan, Y. C. Won and S. L. Jae, *Applied Catalysis A: General* 2008, **345**, 149-154.
4. S. Ma, Y. Deng, J. Xie, K. He, W. Liu, X. Chen and X. Li, *Applied Catalysis B: Environmental*, 2018, **227**, 218-228.
5. J. Ran, G. Gao, F. T. Li, T. Y. Ma, A. Du and S. Z. Qiao, *Nat. Commun.*, 2017, **8**, 13907.
6. L. Tian, S. Min and F. Wang, *Appl. Catal., B*, 2019, **259**, 118029.
7. M. Baojun, X. Haojie, L. Keying, L. Jie, Z. Haijuan, L. Wanyi and L. Can, *ChemSusChem*, 2016, **9**.
